# Supplementary material for: Preparation and characterization of a covalent edge-functionalized lipoic acid–MoS2conjugate
Source: Royal Society of Chemistry journal article supplement (doi:10.1039/c6ra00901h), 2016-01-01
Supplement: c6ra00901h1.pdf [file c6ra00901h1.pdf]

Electronic Supplementary Information for

# Preparation and Characterization of a Covalent Edge- Functionalized Lipoic Acid-MoS<sub>2</sub> Conjugate

*Misoon Jeong, Somin Kim, and Sang-Yong Ju\**

Department of Chemistry, Yonsei University, 50 Yonsei-ro, Seodaemun-Gu, Seoul 03722, Korea

|                                                                                                                                                                                                                                                                                                                                                            |    |
|------------------------------------------------------------------------------------------------------------------------------------------------------------------------------------------------------------------------------------------------------------------------------------------------------------------------------------------------------------|----|
| Table of Contents.....                                                                                                                                                                                                                                                                                                                                     | S1 |
| Figure S1. (a) UV-vis-NIR extinction spectra of LA-MoS <sub>2</sub> prepared by different centrifugal forces. (b) The corresponding zeta ( $\zeta$ ) potential distributions. (c) Average $\zeta$ of LA-MoS <sub>2</sub> samples. (b) The corresponding zeta ( $\zeta$ ) potential distributions. (c) Average $\zeta$ of LA-MoS <sub>2</sub> samples. .... | S2 |
| Figure S2. (a) UV-vis-NIR extinction spectra of 5 mM LA-MoS <sub>2</sub> prepared by different sonication time. (b) The corresponding zeta ( $\zeta$ ) potential distributions. (c) Average $\zeta$ of LA-MoS <sub>2</sub> samples.. ....                                                                                                                  | S2 |
| Figure S3. Additional TEM images (a-d).....                                                                                                                                                                                                                                                                                                                | S3 |
| Figure S4. FT-IR spectra of (a) as-MoS <sub>2</sub> , (b) LA salt, and (c) LA-MoS <sub>2</sub> conjugate .....                                                                                                                                                                                                                                             | S3 |
| Figure S5. TGA traces of LA salt (black), as-MoS <sub>2</sub> (blue), and LA-MoS <sub>2</sub> conjugate (red).....                                                                                                                                                                                                                                         | S4 |
| Figure S6. Additional AFM height images of (a) individual LA-MoS <sub>2</sub> conjugate and (b) aggregates....                                                                                                                                                                                                                                             | S4 |

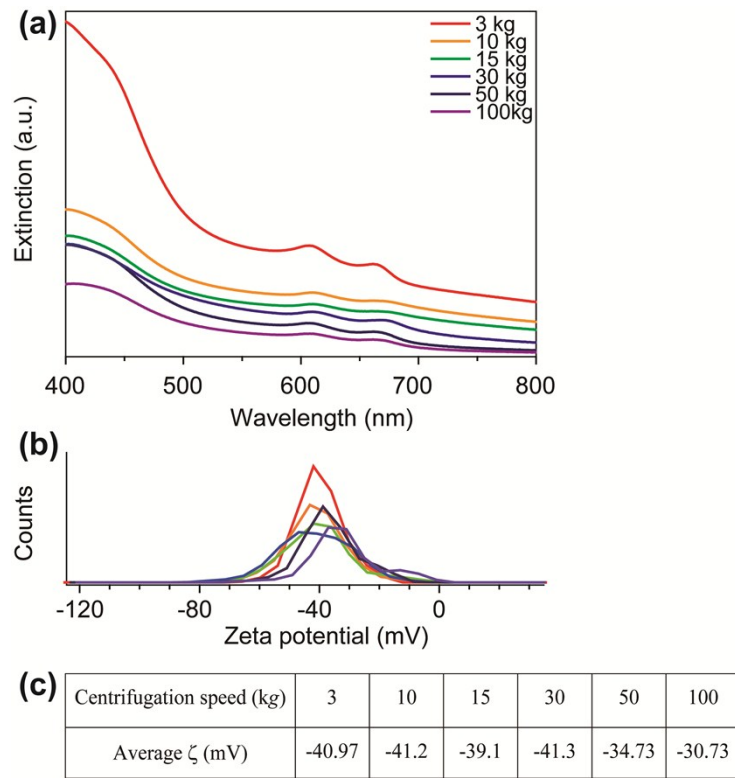

**Figure S1.** (a) UV-vis-NIR extinction spectra of LA-MoS<sub>2</sub> prepared by different centrifugal forces. (b) The corresponding zeta ( $\zeta$ ) potential distributions. (c) Average  $\zeta$  of LA-MoS<sub>2</sub> samples.

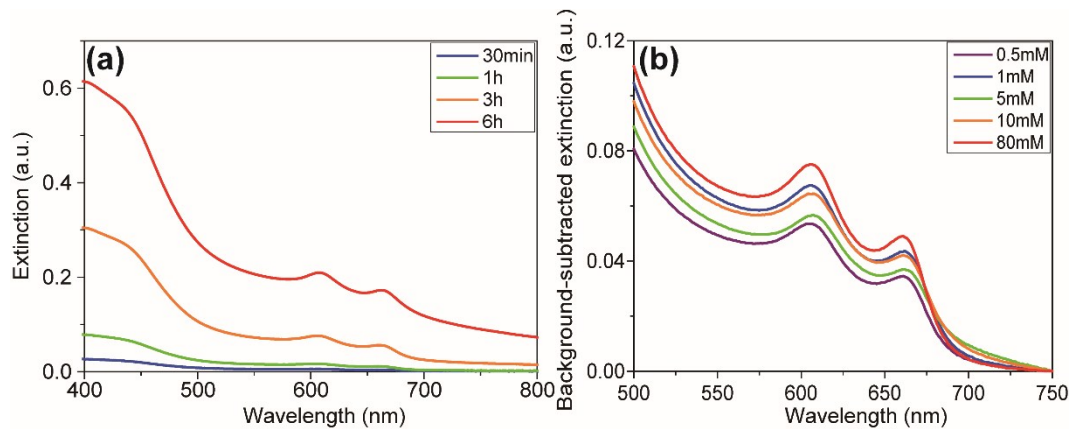

**Figure S2.** (a) UV-vis-NIR extinction spectra of 5 mM LA-MoS<sub>2</sub> prepared by different sonication time. (b) The corresponding zeta ( $\zeta$ ) potential distributions. (c) Average  $\zeta$  of LA-MoS<sub>2</sub> samples.

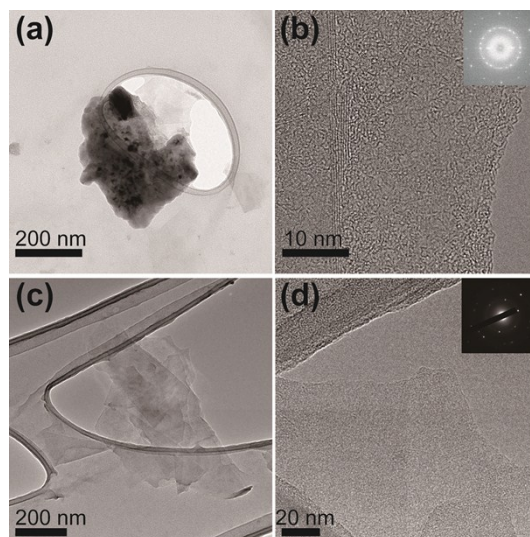

**Figure S3.** Additional TEM images (a-d).

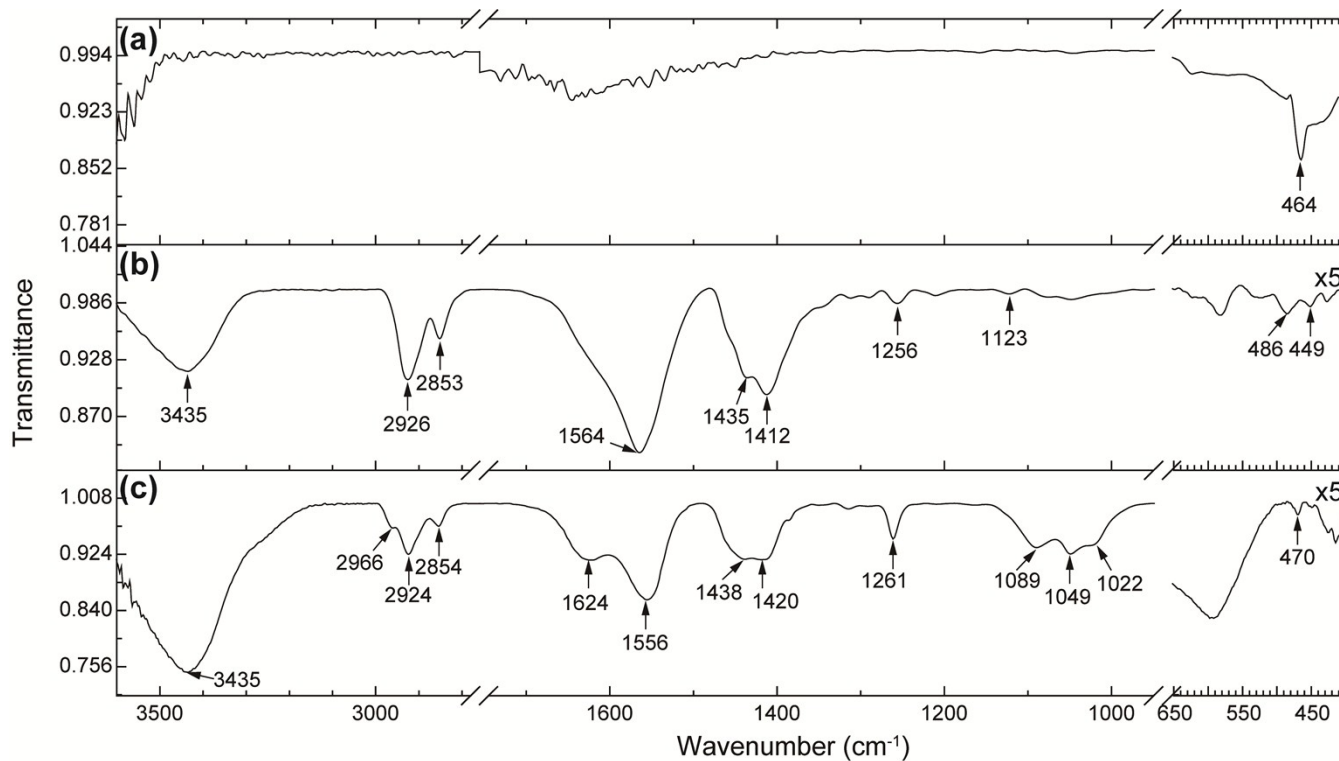

**Figure S4.** FT-IR spectra of (a) as-MoS<sub>2</sub>, (b) LA salt, and (c) LA-MoS<sub>2</sub> conjugate.

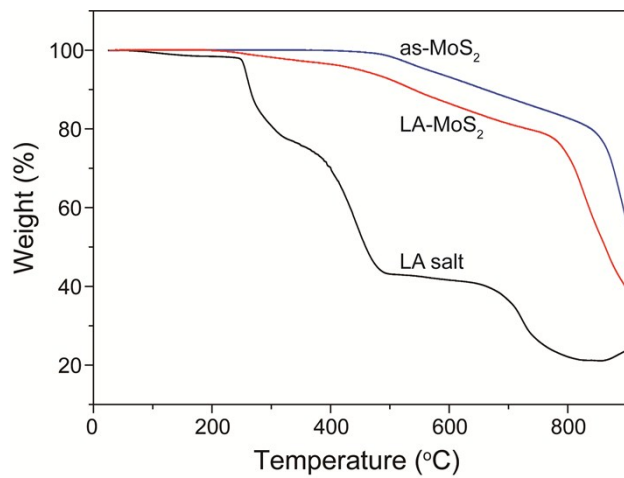

**Figure S5.** TGA traces of LA salt (black), as-MoS<sub>2</sub> (blue), and LA-MoS<sub>2</sub> conjugate (red).

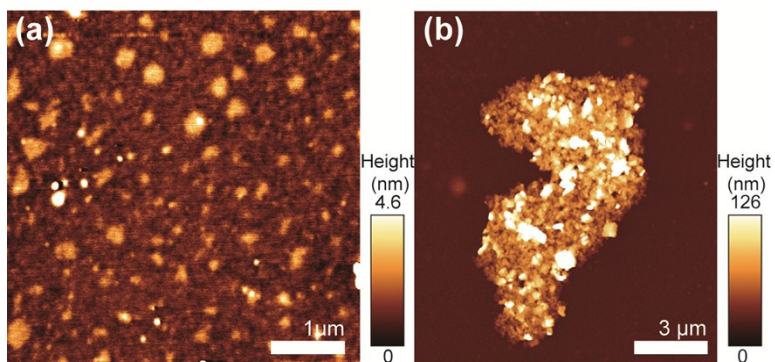

**Figure S6.** Additional AFM height images of (a) individual LA-MoS<sub>2</sub> conjugate and (b) their aggregates.
